# Supplementary material
Source: publisher figshare collection journal article supplement (https://gsajournals.figshare.com/ndownloader/files/17284187)
Supplement: Supplementary file 1 [file 17284187]

## Sheet: Table S3 Autosomal upregulated 
Supplemental Material, Table S3. Autosomal upregulated genes in Smchd1-null mouse NPCs
name	Ensembl_ID
Tfpi	ENSMUSG00000027082
Ccdc166	ENSMUSG00000098176
4833418N02Rik	ENSMUSG00000085287
Kcnj10	ENSMUSG00000044708
Pcdhac2	ENSMUSG00000007440
H2-Q7	ENSMUSG00000060550
Col22a1
Susd1	ENSMUSG00000038578
Syt14	ENSMUSG00000016200
Vipr2	ENSMUSG00000011171
Pcdha11	ENSMUSG00000007440
Aldh18a1	ENSMUSG00000025007
Prex2	ENSMUSG00000048960
Eya4	ENSMUSG00000010461
Flt4	ENSMUSG00000020357
Epb41l3	ENSMUSG00000024044
Pcdha1	ENSMUSG00000103442
Fam234b	ENSMUSG00000030207
Sema4f	ENSMUSG00000000627
Zfp518a	ENSMUSG00000049164
Elavl2	ENSMUSG00000008489
H2-Ab1	ENSMUSG00000073421
Scx	ENSMUSG00000034161
Vax2	ENSMUSG00000034777
Fzd10	ENSMUSG00000081683
Sema3c	ENSMUSG00000028780
Ddit4l	ENSMUSG00000046818
Gata3	ENSMUSG00000015619
Tcaf2	ENSMUSG00000029851
Serpina3n	ENSMUSG00000021091
Hoxc4	ENSMUSG00000075394
Pkdcc	ENSMUSG00000024247
Clstn2	ENSMUSG00000032452
Edar	ENSMUSG00000003227
Gpr45	ENSMUSG00000041907
Mei4	ENSMUSG00000043289
Tbx20	ENSMUSG00000031965
Rundc3b	ENSMUSG00000040570
Hoxb9	ENSMUSG00000020875
Vstm2b
Pcdha10	ENSMUSG00000007440
Pter	ENSMUSG00000026730
Hexa	ENSMUSG00000025232
Gucy1a2
Pnpo	ENSMUSG00000018659
Osmr	ENSMUSG00000022146
1700001L05Rik
Chac1	ENSMUSG00000027313
Zfand4	ENSMUSG00000042213
Cntln	ENSMUSG00000038070
Nkx3-2	ENSMUSG00000049691
Kcnt2	ENSMUSG00000052726
3830406C13Rik	ENSMUSG00000033111
Gabrb3	ENSMUSG00000033676
Slit2	ENSMUSG00000031558
Stab2	ENSMUSG00000035459
Sparcl1	ENSMUSG00000029309
Pcdha12	ENSMUSG00000007440
Ccdc114	ENSMUSG00000040189
Ldah	ENSMUSG00000037669
Aard	ENSMUSG00000068522
Pcsk5	ENSMUSG00000024713
Lynx1	ENSMUSG00000022594
Nudt16	ENSMUSG00000032565
Galnt13	ENSMUSG00000060988
Brinp3	ENSMUSG00000035131
Ror1	ENSMUSG00000035305
Cybrd1	ENSMUSG00000027015
Pcdha5	ENSMUSG00000103092
Lca5l	ENSMUSG00000045275
Jph1	ENSMUSG00000042686
Pcdhac1	ENSMUSG00000007440
Pcdha6	ENSMUSG00000103707
Kank1	ENSMUSG00000032702
Rps6ka2	ENSMUSG00000023809
Dgki	ENSMUSG00000038665
Prelp	ENSMUSG00000041577
Gstk1	ENSMUSG00000029864
Arrdc4	ENSMUSG00000042659
Hoxd3os1
Ldoc1l	ENSMUSG00000055745
Cds1	ENSMUSG00000029330
Stc2
Azin2	ENSMUSG00000028789
Nos1	ENSMUSG00000029361
Fam110b	ENSMUSG00000049119
Svip	ENSMUSG00000074093
Barx1	ENSMUSG00000021381
Pabpc4l	ENSMUSG00000090919
Got1	ENSMUSG00000025190
Pcsk2	ENSMUSG00000027419
Otud7a	ENSMUSG00000033510
Brinp1	ENSMUSG00000028351
Vax2os	ENSMUSG00000085794
Cdc42ep5	ENSMUSG00000063838
Raet1a
Foxc2	ENSMUSG00000046714
Mmp16	ENSMUSG00000028226
Syne3	ENSMUSG00000054150
Ephb6	ENSMUSG00000029869
Osr1	ENSMUSG00000048387
Hoxa10	ENSMUSG00000000938
Hoxa9	ENSMUSG00000038227
Mpg	ENSMUSG00000020287
C1qtnf1
Naglu	ENSMUSG00000001751
Igsf21	ENSMUSG00000040972
Hoxd4	ENSMUSG00000079277
Mthfr	ENSMUSG00000029009
9030624G23Rik
Calb2	ENSMUSG00000003657
Chn1	ENSMUSG00000056486
Tmtc4	ENSMUSG00000041594
Gm11837
D5Ertd605e	ENSMUSG00000106820
Cnnm1	ENSMUSG00000025189
Raet1d	ENSMUSG00000078452
Lbx1
Gata4	ENSMUSG00000021944
Chchd7	ENSMUSG00000042198
D130017N08Rik
H2-Q10	ENSMUSG00000067235
Barhl2	ENSMUSG00000034384
H2-Q9
Cdkn3	ENSMUSG00000037628
Hoxd9	ENSMUSG00000043342
H2-M3	ENSMUSG00000016206
Adamts12	ENSMUSG00000047497
Prune2	ENSMUSG00000039126
Gabra4	ENSMUSG00000029211
Pcdha4	ENSMUSG00000104252
Bmp4	ENSMUSG00000021835
Lrrc32	ENSMUSG00000090958
Zic5
Hdac9	ENSMUSG00000004698
Thrsp	ENSMUSG00000035686
4921504A21Rik	ENSMUSG00000097626
Nptx2	ENSMUSG00000059991
Fbln5	ENSMUSG00000021186
Tmem132c	ENSMUSG00000034324
Hoxa7
Pcdha8	ENSMUSG00000103800
Hoxd8
Trpm3	ENSMUSG00000052387
Parm1
Fcgr3	ENSMUSG00000059498
Fam13a
Tchh	ENSMUSG00000052415
Nrep	ENSMUSG00000042834
Slitrk3	ENSMUSG00000048304
Adarb2	ENSMUSG00000052551
Btbd8	ENSMUSG00000070632
Mtl5	ENSMUSG00000024905
Ppp1r16b	ENSMUSG00000037754
Tmem179	ENSMUSG00000054013
Hoxb4	ENSMUSG00000038692
Ajap1	ENSMUSG00000039546
Sspn	ENSMUSG00000030255
Loxl1	ENSMUSG00000032334
Pcdha2	ENSMUSG00000104148
Card6	ENSMUSG00000041849
Masp1	ENSMUSG00000022887
Cyp4v3
Fbln7	ENSMUSG00000027386
Cxcl12	ENSMUSG00000061353
Casp1	ENSMUSG00000025888
Ndn	ENSMUSG00000033585
Hspb8	ENSMUSG00000041548
D030028A08Rik	ENSMUSG00000078700
Pde8b	ENSMUSG00000021684
Srrm4	ENSMUSG00000063919
Sfi1	ENSMUSG00000023764
Pcdha7	ENSMUSG00000104318
Cdc14b	ENSMUSG00000033102
Eml6	ENSMUSG00000044072
Nlrp5-ps	ENSMUSG00000041596
Gsc	ENSMUSG00000021095
Cntn4	ENSMUSG00000064293
Dsel	ENSMUSG00000038702
4930415F15Rik	ENSMUSG00000020191
Gstt2	ENSMUSG00000033318
Pcdha9	ENSMUSG00000007440
Synpr	ENSMUSG00000056296
Slc29a4	ENSMUSG00000050822
Smc1b	ENSMUSG00000022432
Hoxc5	ENSMUSG00000022485
Gata2	ENSMUSG00000015053
Adamts9	ENSMUSG00000030022
Tspyl5	ENSMUSG00000038984
Fam167a	ENSMUSG00000035095
Slc9a9	ENSMUSG00000031129
Dusp23	ENSMUSG00000026544
Tgfa	ENSMUSG00000029999
Raet1b
Hps1	ENSMUSG00000025188
Ccdc129	ENSMUSG00000037973
Syt16	ENSMUSG00000044912
Slc16a9	ENSMUSG00000037762
Tmem30b	ENSMUSG00000034435
Tusc1	ENSMUSG00000054000
Tshz3	ENSMUSG00000021217
Lefty1	ENSMUSG00000038793
Pax1	ENSMUSG00000037034
Adra1b	ENSMUSG00000050541
Hoxd3	ENSMUSG00000079277
Hlf	ENSMUSG00000003949
Ccdc191	ENSMUSG00000022701
Bricd5	ENSMUSG00000045744
Lipa	ENSMUSG00000024781
Igsf3	ENSMUSG00000042035
Colec12	ENSMUSG00000036103
Fmn2	ENSMUSG00000028354
Gpr158	ENSMUSG00000045967
Stk32b	ENSMUSG00000029123
Zic2	ENSMUSG00000061524
Agpat9	ENSMUSG00000029314
Lrrc17	ENSMUSG00000039883
Dlx2	ENSMUSG00000023391
Tmem45a	ENSMUSG00000022754
Rgs3	ENSMUSG00000059810
Rlbp1	ENSMUSG00000039194
Plscr4	ENSMUSG00000032377
Chrna7	ENSMUSG00000030525
C87414	ENSMUSG00000070686
Hoxb2	ENSMUSG00000075588
Pcdha3	ENSMUSG00000102312
Steap2	ENSMUSG00000015653
Il3ra	ENSMUSG00000068758
Hoxb3	ENSMUSG00000048763
4930452B06Rik	ENSMUSG00000021747
